# Supplementary material for: TLR4 phosphorylation at tyrosine 672 activates the ERK/c‐FOS signaling module for LPS‐induced cytokine responses in macrophages
Source: PubMed Central journal article supplement (PMC10947571; doi:10.1002/eji.202250056), 2023-05-01
Supplement: EJI-53-0-s001.pdf [file EJI-53-0-s001.pdf]

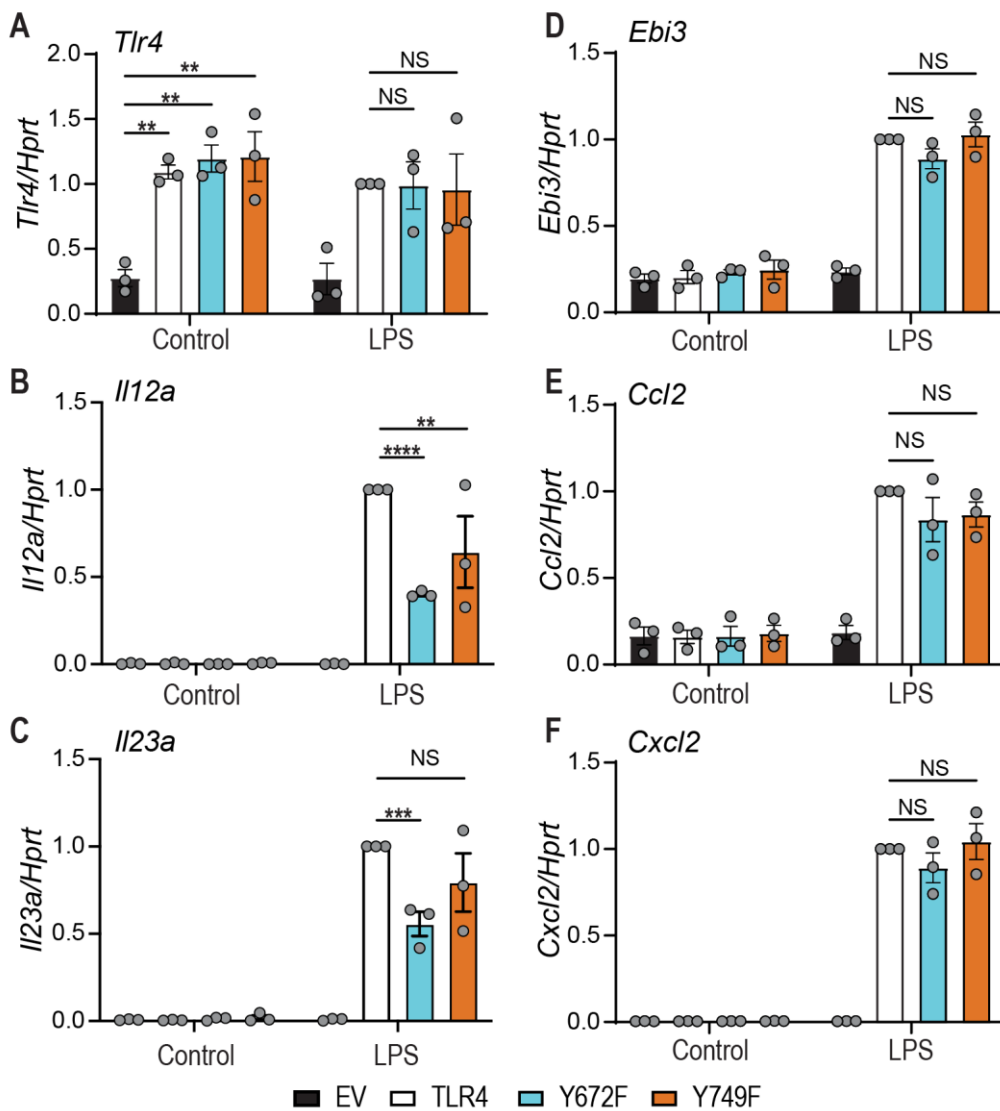

**Supplementary Figure 1. Inflammatory gene expression in TLR4 Y672F and Y749F expressing BMM**

**A-F.** *Tlr4*<sup>-/-</sup> BMM were reconstituted with wild type TLR4, TLR4 mutants or empty vector (EV). Cells were stimulated with LPS (1 ng/ml) for 4 h before total RNA was collected and assessed by RT-qPCR for mRNA levels of *Tlr4* (**A**), *Il12a* (**B**), *Il23a* (**C**), *Ebi3* (**D**), *Ccl2* (**E**) and *Cxcl2* (**F**). Data (mean+SEM, n=3) are combined from three independent experiments and are normalised to the wild type TLR4 + LPS sample. Statistical analyses were performed using a repeated measures two-way ANOVA, followed by Bonferroni's multiple comparison test (NS non-significant, \*\* p<0.01, \*\*\* p<0.001, \*\*\*\* p<0.0001).

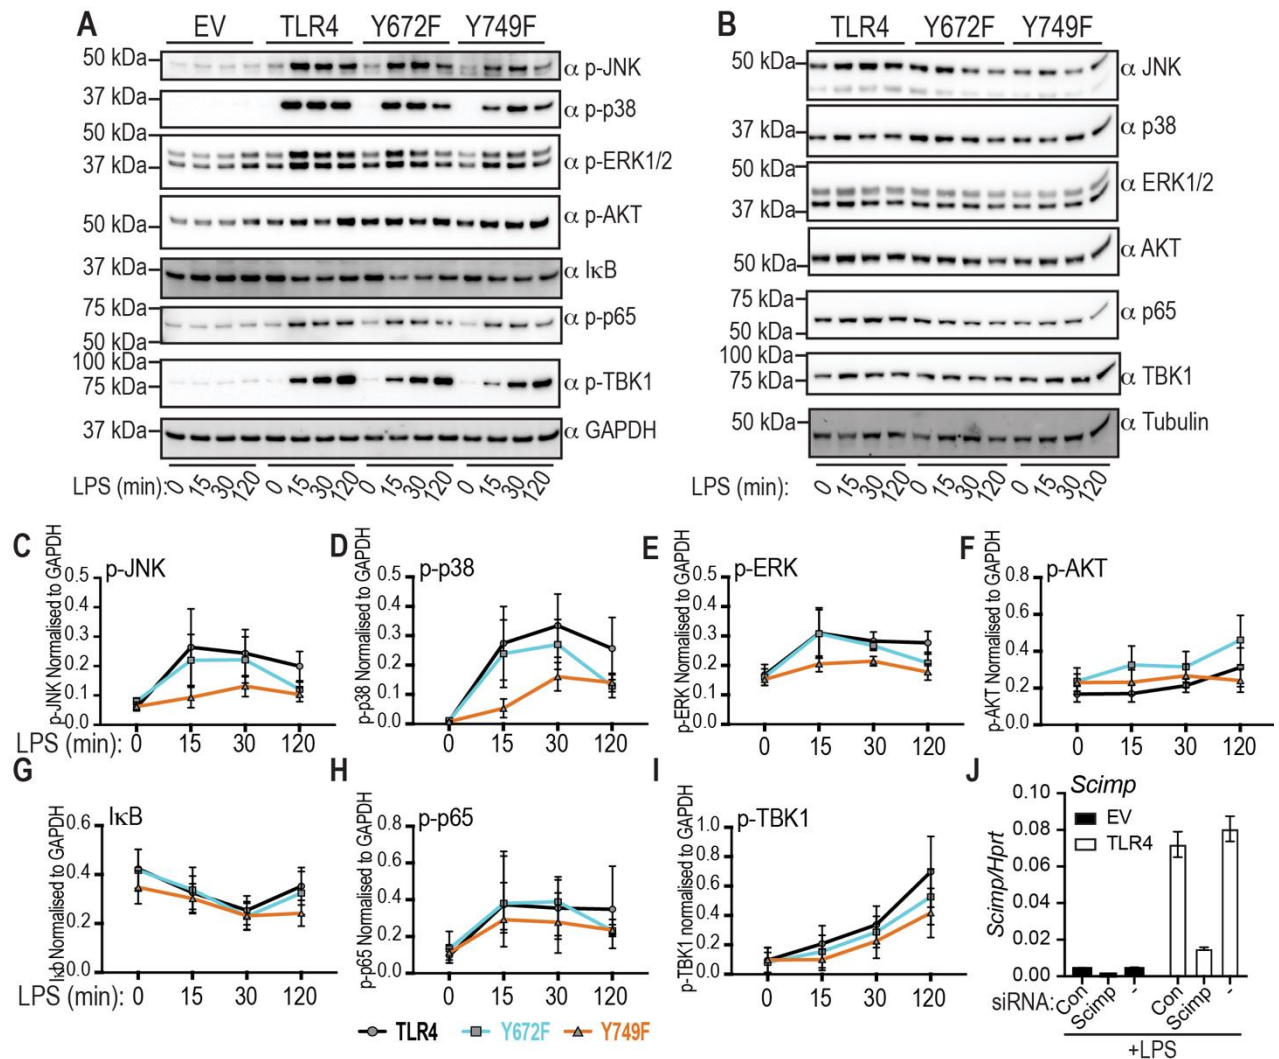

**Supplementary Figure 2. LPS signaling responses in TLR4 Y672F- and TLR4 Y749F-expressing BMM.**

**A-J.** *Tlr4*<sup>-/-</sup> BMM were reconstituted with wild type TLR4, TLR4 mutants or empty vector (EV). **A-I.** Cells were then treated with LPS (1 ng/mL) for the indicated time points. Whole cell lysates were collected and assessed by western blot for levels of phosphorylated or total proteins, as indicated. **C-I.** Western blots were quantified for protein expression (relative to GAPDH expression levels). Data (mean + SEM, n=3-4) are combined from three to four independent experiments. **J.** Cells were electroporated with *Scimp* siRNA, a control siRNA or no siRNA, after which cells were treated with LPS (10 ng/mL) for 4 h before total RNA was collected and assessed by RT-qPCR for mRNA levels of *Scimp*. Data (mean + SD) are from one experiment.

**Supplementary Table 1. Cloning primers**

| <b>Primer</b>           | <b>Sequence (5'-3')</b>                         |
|-------------------------|-------------------------------------------------|
| <i>Tlr4</i> Fwd         | AAAATGCCAGGATGATGCCTCC                          |
| <i>Tlr4</i> Rev         | TCAGGTCCAAGTTGCCGTTTCT                          |
| <i>Tlr4</i> NO STOP Rev | GGTCCAAGTTGC CGTTTCT                            |
| <i>Tlr4</i> Y672F Fwd   | GGAGAAAGCATCTTTGATGCATTT                        |
| <i>Tlr4</i> Y672F Rev   | ATTCTGACTCGAGAAGATCACA                          |
| <i>Tlr4</i> Y749F Fwd   | GTATCTTTGAATTTGAGATTGCTCA                       |
| <i>Tlr4</i> Y749 Rev    | TGAGCAATCTCAAATTCAAAGATAC                       |
| <i>hTLR4</i> Y674A Fwd  | GTATGGTAGAGGTGAAAACATCGCCGATGCCTTTGTTATCTAAAG   |
| <i>hTLR4</i> Y674A Rev  | CTTGAGTAGATAACAAAGGCATCGGCGATGTTTCACCTCTACCATAC |
| <i>hTLR4</i> Y751A Fwd  | CGCTGGTGTATCTTTGAAGCCGAGATTGCTCAGACCTGG         |
| <i>hTLR4</i> Y751A Rev  | CCAGGTCTGAGCAATCTCGGCTTCAAAGATACACCAGCG         |
| <i>hTLR4</i> Y674F Fwd  | TGAAAACATCTTCGATGCCTTTGTTATC                    |
| <i>hTLR4</i> Y674F Rev  | CCTCTACCATACTTTATGC                             |
| <i>hTLR4</i> Y751F Fwd  | TATCTTTGAATTTGAGATTGCTCAGACCTGG                 |
| <i>hTLR4</i> Y751F Rev  | CACCAGCGGCTCTGGATG                              |

**Supplementary Table 2. Constructs**

| <b>Gene</b>          | <b>Backbone</b> |
|----------------------|-----------------|
| <i>Tlr4</i>          | pEF6            |
| <i>Tlr4</i> V5       | pEF6            |
| <i>Tlr4</i> Y672F    | pEF6            |
| <i>Tlr4</i> Y672F V5 | pEF6            |
| <i>Tlr4</i> Y749F    | pEF6            |
| <i>Tlr4</i> Y749F V5 | pEF6            |
| <i>Tlr4</i>          | pMIGRMCS_GFP    |
| <i>Tlr4</i> V5       | pMIGRMCS_GFP    |
| <i>Tlr4</i> Y672F    | pMIGRMCS_GFP    |
| <i>Tlr4</i> Y672F V5 | pMIGRMCS_GFP    |
| <i>Tlr4</i> Y749F    | pMIGRMCS_GFP    |

|                                   |              |
|-----------------------------------|--------------|
| <i>Tlr4</i> Y749F V5              | pMIGRMCS_GFP |
| <i>hTLR4-mEGFP</i>                | pcDNA3       |
| <i>hTLR4</i> Y674A- <i>mEGFP</i>  | pcDNA3       |
| <i>hTLR4</i> Y674F- <i>mEGFP</i>  | pcDNA3       |
| <i>hTLR4</i> Y751A - <i>mEGFP</i> | pcDNA3       |
| <i>hTLR4</i> Y751F- <i>mEGFP</i>  | pcDNA3       |

**Supplementary Table 3. Antibodies**

| <b>Antibody</b>                       | <b>Application</b> | <b>Dilution</b>       | <b>Manufacturer/Catalogue</b>                        |
|---------------------------------------|--------------------|-----------------------|------------------------------------------------------|
| Mouse anti-V5 tag                     | WB                 | 1:2500<br>(0.4 µg/mL) | Bio-Rad, California, USA<br>Cat: MCA1360             |
| Rabbit anti-GAPDH                     | WB                 | 1:1000<br>(1 µg/mL)   | R&D Systems, Minneapolis, USA<br>Cat: RDS2275PC100   |
| Rabbit anti-p-Jnk (Thr183/185)        | WB                 | 1:1000<br>(293 ng/mL) | Cell Signaling Technology, Boston, USA<br>Cat: 4668  |
| Rabbit anti-p-ERK1/2 (Thr 202/204)    | WB                 | 1:1000<br>(101 ng/mL) | Cell Signaling Technology, Boston, USA<br>Cat: 9101S |
| Rabbit anti-p-p38 (MAPK) (Thr180/182) | WB                 | 1:1000<br>(46 ng/mL)  | Cell Signaling Technology, Boston USA<br>Cat: 9211   |
| Rabbit anti-p-p65 (NFκB) (Ser 536)    | WB                 | 1:1000<br>(57 ng/mL)  | Cell Signaling Technology, Boston, USA<br>Cat: 3033  |
| Rabbit anti-IκB                       | WB                 | 1:1000<br>(325 ng/mL) | Cell Signaling Technology, Boston, USA<br>Cat: 4812  |
| Rabbit anti-p-AKT (Ser 473)           | WB                 | 1:1000<br>(10 ng/mL)  | Cell Signaling Technology, Boston, USA<br>Cat: 9271  |
| Rabbit anti-p-TBK1 (Ser 172)          | WB                 | 1:1000<br>(141 ng/mL) | Cell Signaling Technology, Boston, USA<br>Cat: 5483  |
| Rabbit anti-p-cFOS (Ser 32)           | WB                 | 1:1000<br>(57 ng/mL)  | Cell Signaling Technology, Boston, USA               |

|                                                      |       |                        |                                                        |
|------------------------------------------------------|-------|------------------------|--------------------------------------------------------|
|                                                      |       |                        | Cat: 5348                                              |
| Rabbit anti-JNK                                      | WB    | 1:1000<br>(1 µg/mL)    | Cell Signaling Technology, Boston,<br>USA<br>Cat: 9258 |
| Rabbit anti-p38                                      | WB    | 1:1000<br>(23 ng/mL)   | Cell Signaling Technology, Boston,<br>USA<br>Cat: 9212 |
| Rabbit anti-ERK1/2                                   | WB    | 1:1000<br>(19 ng/mL)   | Cell Signaling Technology, Boston,<br>USA<br>Cat: 9102 |
| Rabbit anti-AKT                                      | WB    | 1:1000<br>(31 ng/mL)   | Cell Signaling Technology, Boston,<br>USA<br>Cat: 9272 |
| Rabbit anti-p65                                      | WB    | 1:1000<br>(208 ng/mL)  | Cell Signaling Technology, Boston,<br>USA<br>Cat: 8242 |
| Rabbit anti-TBK1                                     | WB    | 1:1000<br>(174 ng/mL)  | Cell Signaling Technology, Boston,<br>USA<br>Cat: 3013 |
| Mouse anti-phosphotyrosine<br>(4G10)                 | WB    | 1:1000                 | Merck, Darmstadt, Germany<br>Cat: 05-1050              |
| Goat HRP-linked anti-rabbit IgG                      | WB    | 1:2500<br>(24 ng/mL)   | Cell Signaling Technology, Boston,<br>USA<br>Cat: 7074 |
| Goat HRP-linked anti-mouse<br>IgG                    | WB    | 1:2500<br>(73.6 ng/mL) | Cell Signaling Technology, Boston,<br>USA<br>Cat: 7076 |
| Human- Rhodamine Anti-<br>GAPDH                      | WB    | 1:10000                | Bio-Rad, California, USA<br>Cat: 12004167              |
| Rat anti- mouse IL-6<br>(Capture)                    | ELISA | 1:500<br>(1 µg/mL)     | BD Biosciences, California, USA<br>Cat: 554400         |
| Rat biotinylated anti- mouse IL-<br>6<br>(Detection) | ELISA | 1:500<br>(1 µg/mL)     | BD Biosciences, California, USA<br>Cat: 554402         |
| Rat anti- mouse IL-12p40<br>(Capture)                | ELISA | 1:250<br>(4 µg/mL)     | BD Biosciences, California, USA<br>Cat: 551219         |

|                                                   |       |                    |                                                |
|---------------------------------------------------|-------|--------------------|------------------------------------------------|
| Rat biotinylated anti- mouse IL-12p40 (Detection) | ELISA | 1:500<br>(2 µg/mL) | BD Biosciences, California, USA<br>Cat: 554476 |
| Rat anti- mouse TNF (Capture)                     | ELISA | 1:250              | BD Biosciences, California, USA<br>Cat: 558534 |
| Rat biotinylated anti- mouse TNF (Detection)      | ELISA | 1:250              | BD Biosciences, California, USA<br>Cat: 558534 |
| Rat APC-conjugated anti- mouse TLR4 (SA 15-21)    | Flow  | 2.5 µg/mL          | Biolegend<br>Cat: 145406                       |

**Supplementary Table 4. RT-qPCR primers**

| Gene         | Forward Primer (5'-3')       | Reverse Primer (5'-3')       | Amplicon size (bp) |
|--------------|------------------------------|------------------------------|--------------------|
| <i>Il6</i>   | CTGCAAGAGACTTCCATCCAGTT      | GAAGTAGGGAAGGCCGTGG          | 70                 |
| <i>Il12b</i> | GGAAGCACGGCAGCAGAATA         | AACTTGAGGGAGAAGTAGGAATG<br>G | 180                |
| <i>Tnf</i>   | CATCTTCTCAAATTCGAGTGACA<br>A | TGGGAGTAGACAAGGTACAACCC      | 175                |
| <i>Ifnb1</i> | CCACAGCCCTCTCCATCAAC         | TGAAGTCCGCCCTGTAGGTG         | 123                |
| <i>Hprt</i>  | GCAGTACAGCCCCAAAATGG         | AACAAAGTCTGGCCTGTATCCAA      | 85                 |
| <i>Tlr4</i>  | TGGCTAGGACTCTGATCATGGC       | TGAAGAAGGAATGTCATCAGGG       | 143                |
| <i>Ccl2</i>  | GCTTCTTTGGGACACCTGCTG        | CCCCTCACCTGCTGCTACTCA        | 99                 |
| <i>Ebi3</i>  | GACGTGCACCTGTTCTCCAC         | GATGATTCGCTCAGCCACAA         | 105                |
| <i>Cxcl2</i> | GAACAAAGGCAAGGCTAACTGAC      | CATCAGGTACGATCCAGGCTTC       | 120                |
| <i>Il12a</i> | GGTGAAGACGGCCAGAGAAA         | TCTTCAATGTGCTGGTTTGGTC       | 98                 |
| <i>Il23a</i> | CCAGCGGGACATATGAATCTACT      | ACAACCATCTTCACACTGGATACG     | 87                 |
